# Supplementary material
Source: ML conference proceedings conference paper supplement (https://openaccess.thecvf.com/content/CVPR2021/html/Bai_Learning_Scalable_lY-Constrained_CVPR_2021_paper.html)
Supplement: Supplementary file 1 [file Bai_Learning_Scalable_lY-Constrained_CVPR_2021_supplemental.pdf]

# Learning Scalable $\ell_\infty$ -constrained Near-lossless Image Compression via Joint Lossy Image and Residual Compression

## Supplementary Material

### 1. Lossy Image Compressor Architecture

As shown in Fig. 1, we employ the hyper-prior model proposed in [1], where side information  $\hat{z}$  is extracted to model the distribution of  $\hat{y}$ . We employ the residual and attention blocks to model analysis/synthesis transforms, similar to [2, 3].

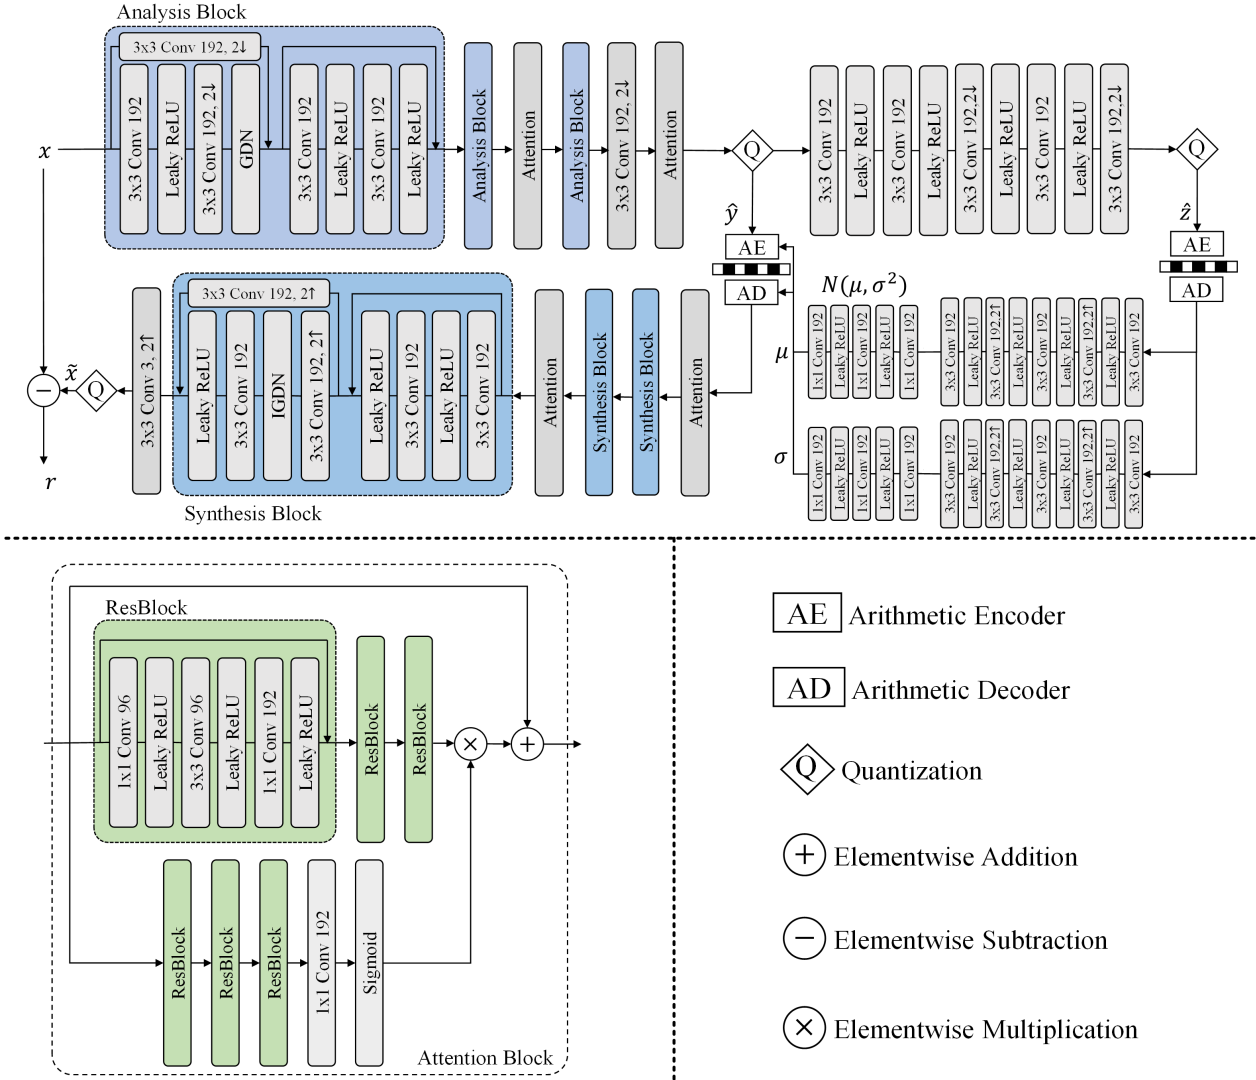

Figure 1. Lossy image compressor architecture. Top: overview. Bottom left: attention block. Bottom right: legend.

## 2. Proof of Entropy Reduction Resulting from Uniform Quantization

**Proposition 1.** Let  $x \in \{a, a+1, \dots, a+N\}$  be a discrete random variable with probability mass function (PMF)  $p(x)$ , where  $a$  and  $N \geq 0$  are two integers. Suppose that  $x$  is quantized to  $\hat{x}$  by

$$\hat{x} = \text{sgn}(x)(2\tau + 1)\lfloor(|x| + \tau)/(2\tau + 1)\rfloor, \quad \tau = 0, 1, \dots, M \quad (1)$$

where  $\text{sgn}(\cdot)$  denotes the sign function and  $M \geq 0$  is an integer. The PMF  $\hat{p}(\hat{x})$  of the quantized  $\hat{x}$  is

$$\hat{p}(\hat{x}) = \sum_{x=\hat{x}-\tau}^{\hat{x}+\tau} p(x) \quad (2)$$

Let  $H(x)$  and  $H(\hat{x})$  be the entropy of  $x$  and  $\hat{x}$  respectively, we have

$$H(x) \geq H(\hat{x}) \quad (3)$$

In words, uniformly quantizing  $x$  with (1) leads to entropy reduction.

*Proof.* Based on the definition of entropy and (2), we have

$$H(x) = - \sum_x p(x) \log p(x) \quad (4)$$

$$= - \sum_{\hat{x}} \sum_{x=\hat{x}-\tau}^{\hat{x}+\tau} p(x) \log p(x) \quad (5)$$

$$\geq - \sum_{\hat{x}} \sum_{x=\hat{x}-\tau}^{\hat{x}+\tau} p(x) \log \hat{p}(\hat{x}) \quad (6)$$

$$= - \sum_{\hat{x}} \hat{p}(\hat{x}) \log \hat{p}(\hat{x}) = H(\hat{x}) \quad (7)$$

Inequality (6) holds, because  $\hat{p}(\hat{x}) \geq p(x)$  for  $x \in [\hat{x} - \tau, \hat{x} + \tau]$ .  $\square$

Proposition 1 is the theoretical foundation for our scalable compression scheme corresponding to residual quantization.

## 3. More Visual Results

We show more visual results of the near-lossless reconstructions of our codec on Kodak dataset [4] in Fig. 2, 3, 4 and 5. Compared with the raw images, no visual artifacts are introduced by residual quantization. Human eyes can hardly differentiate between the the raw images and the near-lossless reconstructions of our codec at  $\tau \leq 5$ .

## References

- [1] Johannes Ballé, David Minnen, Saurabh Singh, Sung Jin Hwang, and Nick Johnston. Variational image compression with a scale hyperprior. In *Int. Conf. Learn. Represent.*, 2018. 1
- [2] Zhengxue Cheng, Heming Sun, Masaru Takeuchi, and Jiro Katto. Learned image compression with discretized gaussian mixture likelihoods and attention modules. In *IEEE Conf. Comput. Vis. Pattern Recog.*, pages 7939–7948, 2020. 1
- [3] Zongyu Guo, Yaojun Wu, Runsen Feng, Zhizheng Zhang, and Zhibo Chen. 3-d context entropy model for improved practical image compression. In *IEEE Conf. Comput. Vis. Pattern Recog. Worksh.*, pages 116–117, 2020. 1
- [4] Eastman Kodak. Kodak lossless true color image suite (photocd pcd0992), 1993. <http://r0k.us/graphics/kodak/>. 2

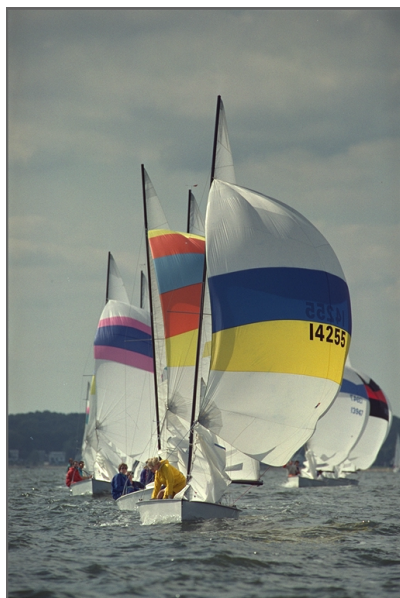

(a) Raw image /  $\lambda, \tau = 0.03, 0$

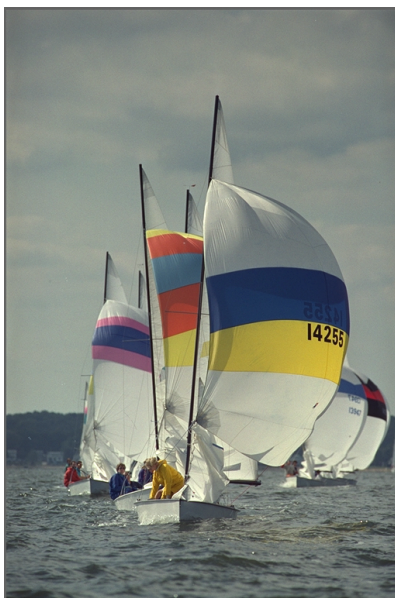

(b)  $\lambda, \tau = 0.03, 1$

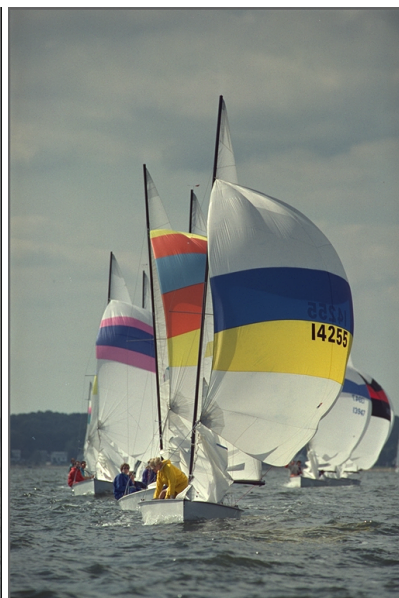

(c)  $\lambda, \tau = 0.03, 2$

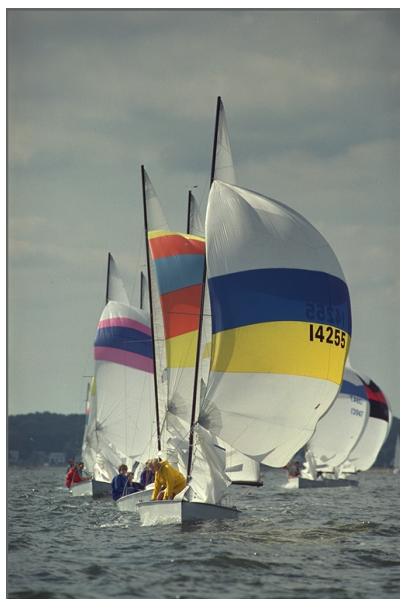

(d)  $\lambda, \tau = 0.03, 3$

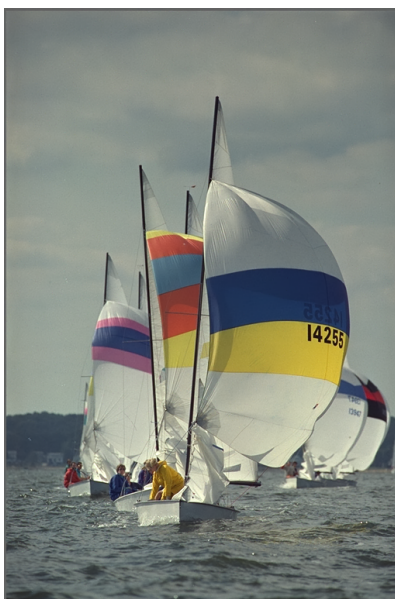

(e)  $\lambda, \tau = 0.03, 4$

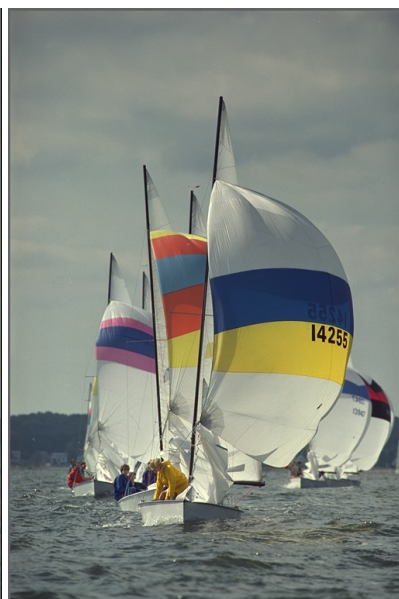

(f)  $\lambda, \tau = 0.03, 5$

Figure 2. *Kodim09*. Near-lossless image codec is trained with  $\lambda = 0.03$ . Visualization of near-lossless reconstructions with different  $\tau$ .



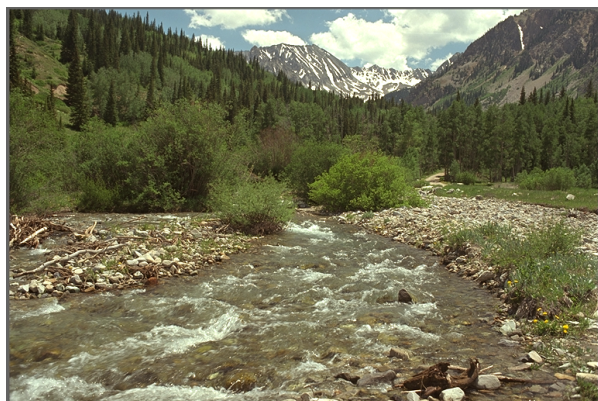

(a) Raw image /  $\lambda, \tau = 0.03, 0$

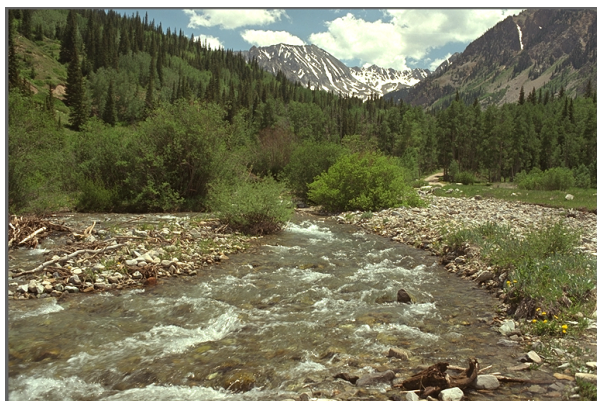

(b)  $\lambda, \tau = 0.03, 1$

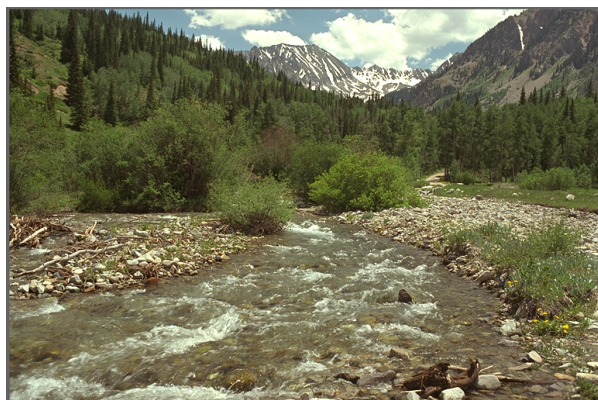

(c)  $\lambda, \tau = 0.03, 2$

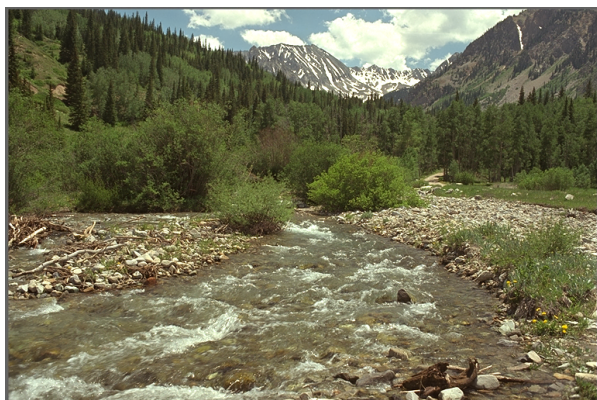

(d)  $\lambda, \tau = 0.03, 3$

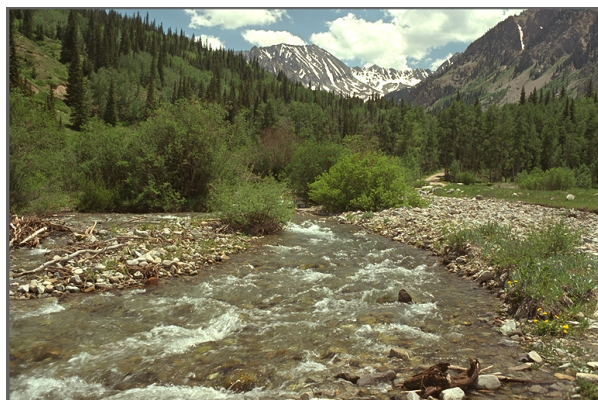

(e)  $\lambda, \tau = 0.03, 4$

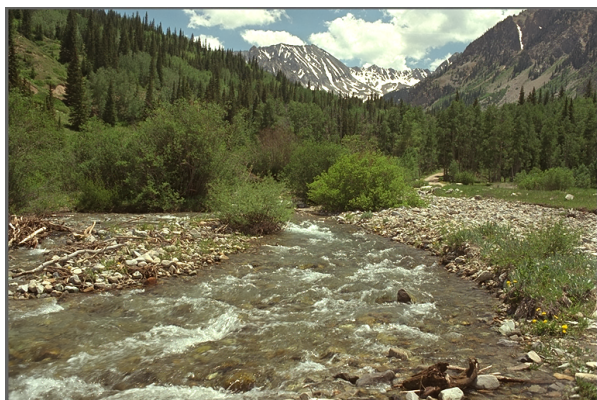

(f)  $\lambda, \tau = 0.03, 5$

Figure 3. *Kodim13*. Near-lossless image codec is trained with  $\lambda = 0.03$ . Visualization of near-lossless reconstructions with different  $\tau$ .



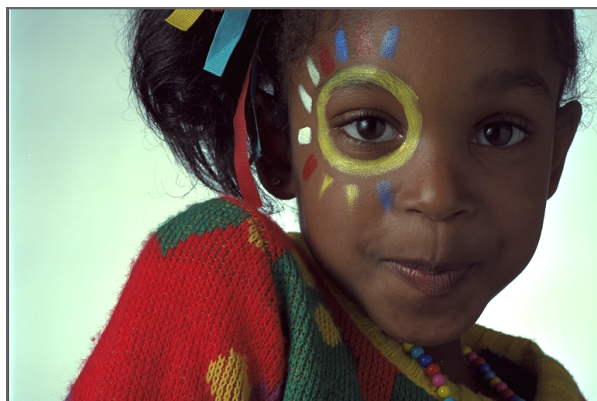

(a) Raw image /  $\lambda, \tau = 0.03, 0$

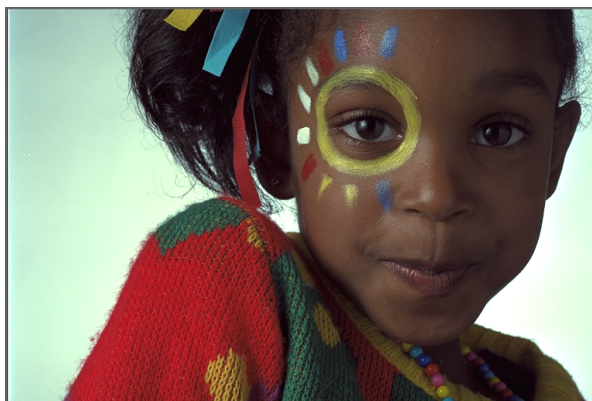

(b)  $\lambda, \tau = 0.03, 1$

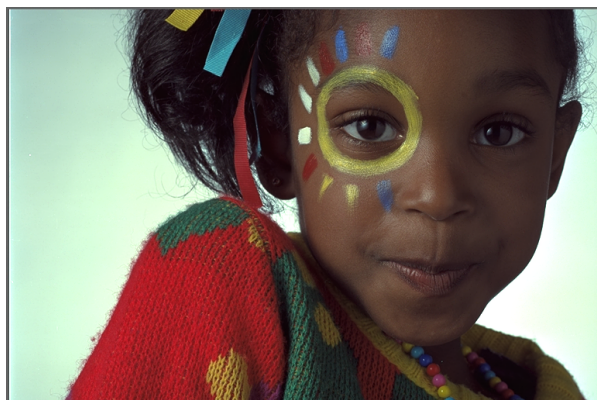

(c)  $\lambda, \tau = 0.03, 2$

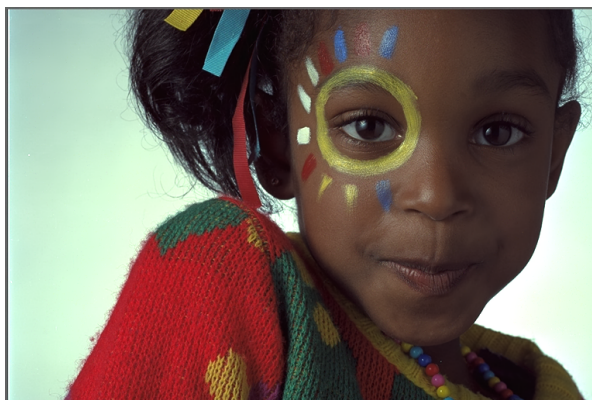

(d)  $\lambda, \tau = 0.03, 3$

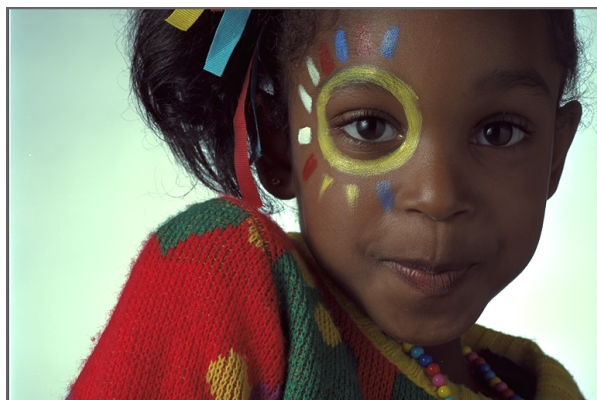

(e)  $\lambda, \tau = 0.03, 4$

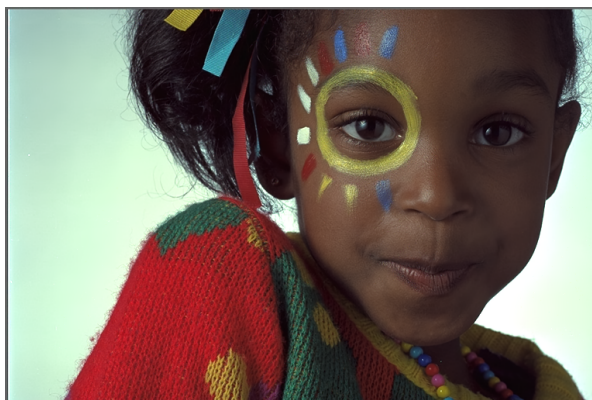

(f)  $\lambda, \tau = 0.03, 5$

Figure 4. *Kodim15*. Near-lossless image codec is trained with  $\lambda = 0.03$ . Visualization of near-lossless reconstructions with different  $\tau$ .



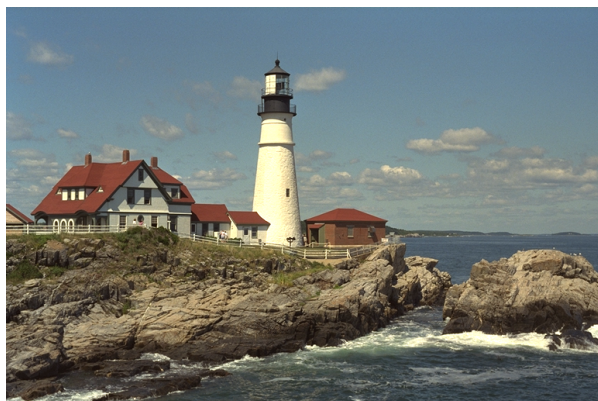

(a) Raw image /  $\lambda, \tau = 0.03, 0$

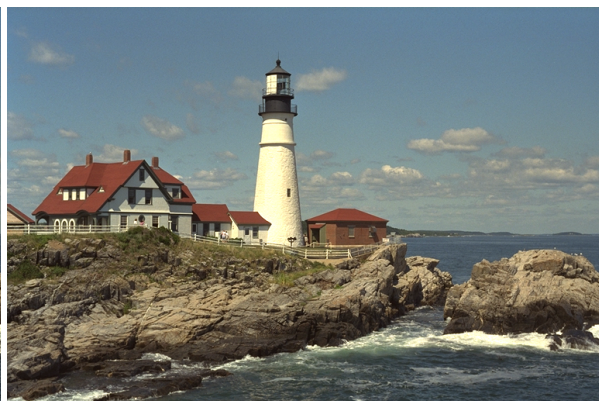

(b)  $\lambda, \tau = 0.03, 1$

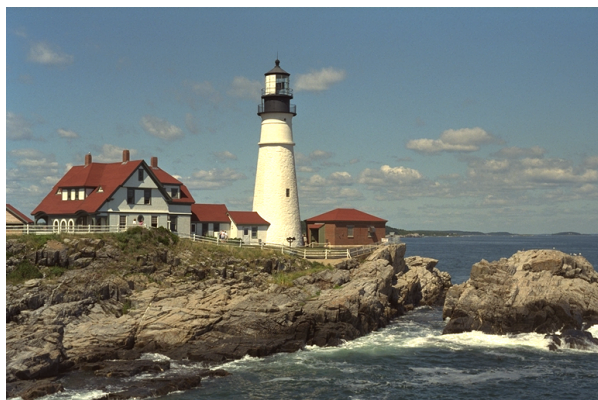

(c)  $\lambda, \tau = 0.03, 2$

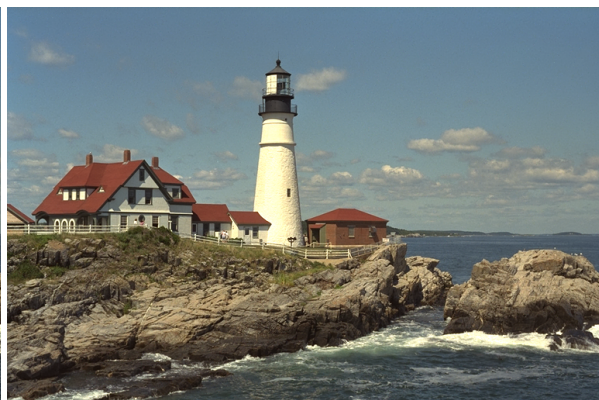

(d)  $\lambda, \tau = 0.03, 3$

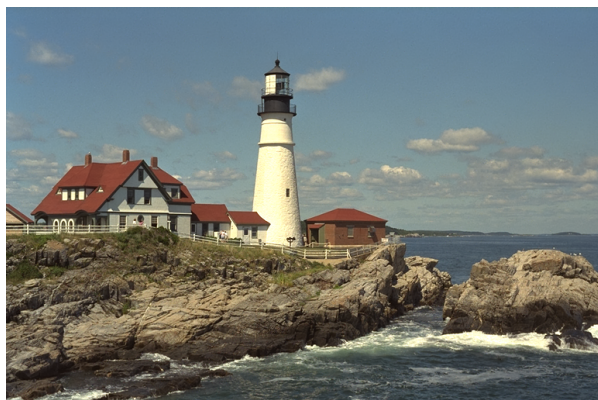

(e)  $\lambda, \tau = 0.03, 4$

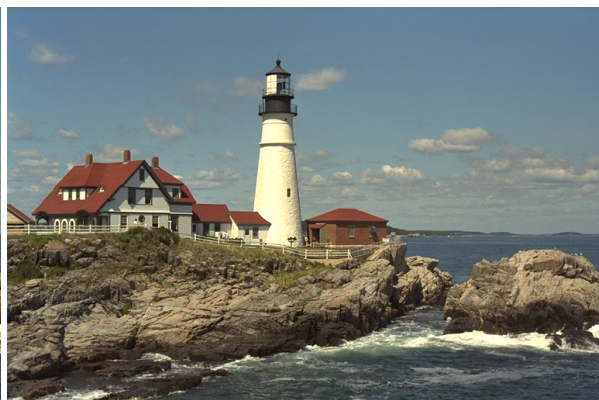

(f)  $\lambda, \tau = 0.03, 5$

Figure 5. *Kodim21*. Near-lossless image codec is trained with  $\lambda = 0.03$ . Visualization of near-lossless reconstructions with different  $\tau$ .
